# Supplementary material for: Colorimetric determination of copper(ii) ions using gold nanoparticles as a probe
Source: Royal Society of Chemistry journal article supplement (doi:10.1039/c5ra20381c), 2015-01-01
Supplement: c5ra20381c1.pdf [file c5ra20381c1.pdf]

## Supporting Information

### Colorimetric determination of copper(II) ions using gold nanoparticles as probe

Yingjie Ye,<sup>a,\*</sup> Mingxiu Lv,<sup>a</sup> Xiaoyu Zhang<sup>a</sup> and Yongxing Zhang<sup>b,\*</sup>

<sup>a</sup>School of Materials and Chemical Engineering, Henan Institute of Engineering, Zhengzhou, Henan 451191, P.R. China. E-mail: yyj6473@126.com. Tel: +86-371-67718909.

<sup>b</sup>School of Physics and Electronic Information, Huaibei Normal University, Huaibei, Anhui 235000, P. R. China. Email: zyx07157@mail.ustc.edu.cn. Tel.: +86-561-3803394.

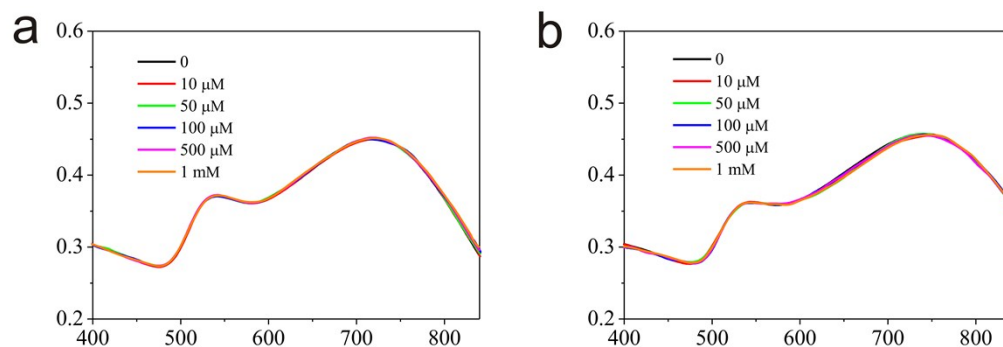

**Fig. S1.** UV-visible absorption spectra of the aggregated PVP-AuNPs induced by (a) 10  $\mu\text{M}$  and (b) 20  $\mu\text{M}$  MBI under different concentrations of  $\text{Cu}^{2+}$ : 0, 10  $\mu\text{M}$ , 50  $\mu\text{M}$ , 100  $\mu\text{M}$ , 500  $\mu\text{M}$ , and 1 mM, respectively. Conditions: 900  $\mu\text{L}$  PVP-AuNPs + 100  $\mu\text{L}$   $\text{Cu}^{2+}$ . The concentration of PVP in the PVP-AuNPs nanodispersion is 0.025%.

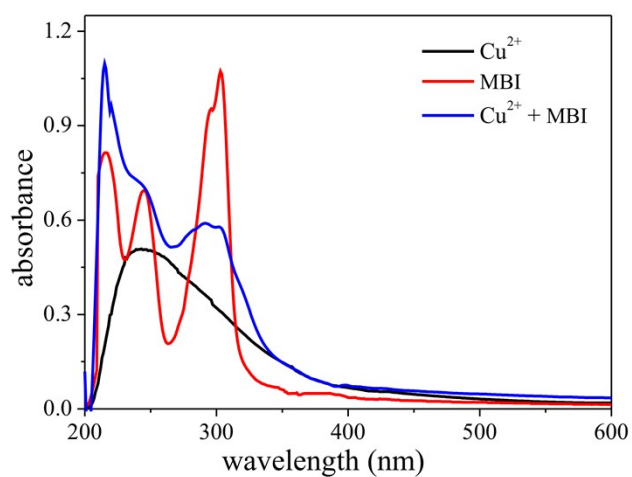

**Fig. S2.** UV-vis spectra for solutions of Cu<sup>2+</sup>, MBI, and Cu<sup>2+</sup> + MBI. The concentrations of Cu<sup>2+</sup> and MBI are 100  $\mu$ M and 500  $\mu$ M, respectively.

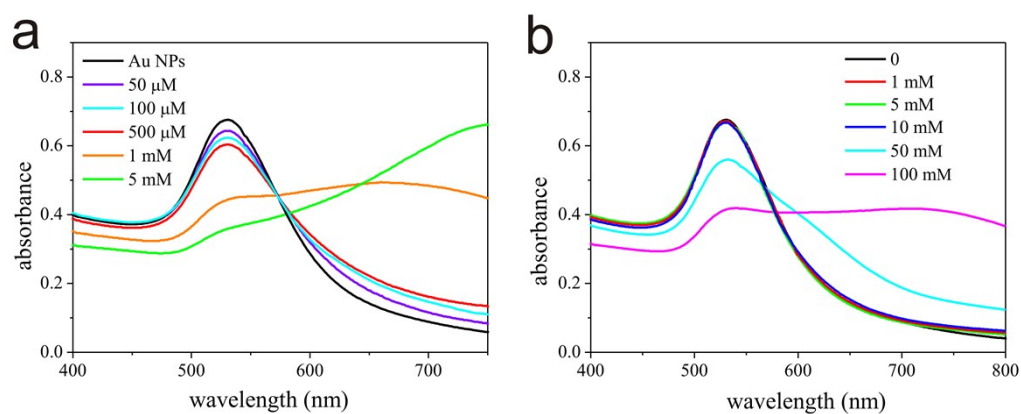

**Fig. S3.** (a) UV-Vis spectra of AuNPs (900  $\mu$ L) with various amounts of Cu<sup>2+</sup> (100  $\mu$ L). (b) UV-Vis spectra of PVP-AuNPs with various amounts of Cu<sup>2+</sup>. Conditions: 900  $\mu$ L PVP-AuNPs + 100  $\mu$ L Cu<sup>2+</sup>. The concentration of PVP in the PVP-AuNPs nanodispersion is 0.025%.

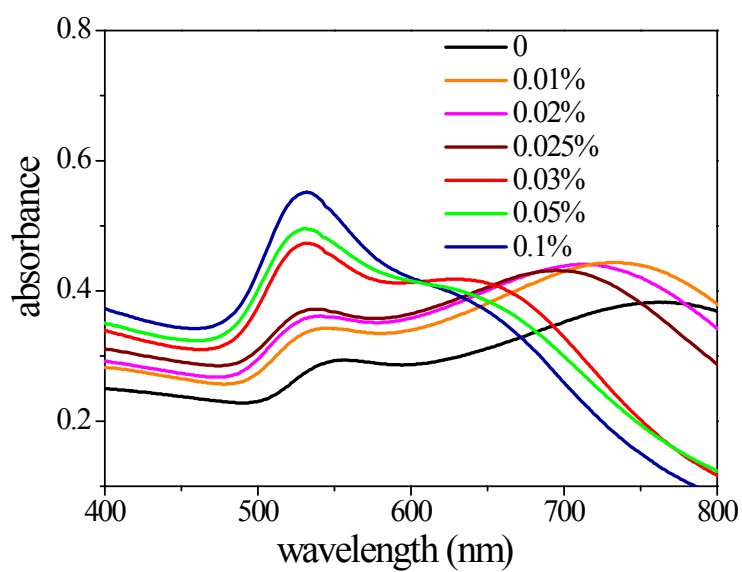

**Fig. S4.** Effect of PVP concentration on the absorbance of AuNPs (900  $\mu\text{L}$ ) with the addition of MBI (10  $\mu\text{M}$ ) in 100  $\mu\text{L}$  of buffer (20 mM). The concentrations of PVP in the AuNPs were 0, 0.01%, 0.02%, 0.025%, 0.03%, 0.05% and 0.1%, respectively.
